RESEARCH ARTICLE

# Ecotin protects *Salmonella* Typhimurium against the microbicidal activity of host proteases

Lucas Saposnik<sup>1,2</sup>, Lorena M. Coria<sup>1,2</sup>, Laura Bruno<sup>1,2</sup>, Francisco F. Guaimas<sup>1,2</sup>, Julieta Pandolfi<sup>3</sup>, Melina Pol<sup>3</sup>, Maria Eugenia Urga<sup>3</sup>, Florencia Sabbione<sup>4</sup>, Michael McClelland<sup>5</sup>, Analia Trevani<sup>4</sup>, Karina A. Pasquevich<sup>1,2</sup>, Juliana Cassataro<sup>1,2\*</sup>

**1** Instituto de Investigaciones Biotecnológicas CONICET, Universidad Nacional de San Martín, Buenos Aires, Argentina, **2** Escuela de Bio y Nanotecnologías (EBYN), Universidad Nacional de San Martín, San Martín, **3** Servicio de Anatomía Patológica del Hospital Italiano de Buenos Aires, CABA, Argentina, **4** Laboratorio de Inmunidad Innata, Instituto de Medicina Experimental (IMEX)-CONICET, Academia Nacional de Medicina, CABA, Argentina, **5** Department of Microbiology and Molecular Genetics, University of California, Irvine, California, United States of America

\* [jucassataro@iib.unsam.edu.ar](mailto:jucassataro@iib.unsam.edu.ar)

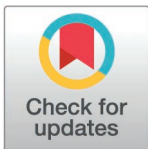

## OPEN ACCESS

**Citation:** Saposnik L, Coria LM, Bruno L, Guaimas F, Pandolfi J, Pol M, et al. (2025) Ecotin protects *Salmonella* Typhimurium against the microbicidal activity of host proteases. PLoS Pathog 21(3): e1013013. <https://doi.org/10.1371/journal.ppat.1013013>

**Editor:** Denise M. Monack, Stanford University School of Medicine, UNITED STATES OF AMERICA

**Received:** June 20, 2024

**Accepted:** March 1, 2025

**Published:** March 28, 2025

**Copyright:** © 2025 Saposnik et al. This is an open access article distributed under the terms of the [Creative Commons Attribution License](https://creativecommons.org/licenses/by/4.0/), which permits unrestricted use, distribution, and reproduction in any medium, provided the original author and source are credited.

**Data availability statement:** All data are in the manuscript and/or supporting information files.

**Funding:** This work was supported by the National Agency of Promotion of Science and Technology (<https://www.argentina.gob.ar/ciencia/agencia>) from Argentina by grants PICT 2019 0625 and PICTA BCEI CAT III 2021 48 to JC. MM was supported, in part, by US National

## Abstract

*Salmonella enterica* serovar Typhimurium causes acute diarrhea upon oral infection in humans. The harsh and proteolytic environment found in the gastrointestinal tract is the first obstacle that these bacteria face after infection. However, the mechanisms that allow *Salmonella* to survive the hostile conditions of the gut are poorly understood. The *ecotin* gene is found in an extensive range of known phyla of bacteria and it encodes a protein that has been shown to inhibit serine proteases. Thus, in the present work we studied the role of *ecotin* of *Salmonella* Typhimurium in host-pathogen interactions. We found that the *Salmonella* Typhimurium  $\Delta ecotin$  strain exhibited lower inflammation in a murine model of *Salmonella* induced colitis. The  $\Delta ecotin$  mutant was more susceptible to the action of pancreatin and purified pancreatic elastase. In addition, the lack of *ecotin* led to impaired adhesion to Caco-2 and HT-29 cell lines, related to the proteolytic activity of brush border enzymes. Besides,  $\Delta ecotin$  showed higher susceptibility to lysosomal proteolytic content and intracellular replication defects in macrophages. In addition, we found Ecotin to have a crucial role in *Salmonella* against the microbicidal action of granule contents and neutrophil extracellular traps released from human polymorphonuclear leukocytes. Thus, the work presented here highlights the importance of *ecotin* in *Salmonella* as countermeasures against the host proteolytic defense system.

## Author summary

After oral administration or infection, the gastrointestinal system digests food or pathogens in a non-specific fashion. Proteases are one of the main mechanisms of digestion. *Salmonella* Typhimurium is one of the most important agents that induces diarrhea and is a successful foodborne pathogen due to its vast array of virulence determinants, but little is known about its capacity to confront against the proteolysis of the gut lumen and

Institutes of Health (<https://www.nih.gov/>) grants R01 AI136520 and R03 AI139557. The funders did not play a role in study design, data collection and analysis, decision to publish, or preparation of the manuscript.

**Competing interests:** I have read the journal's policy and JC, KP and LC have the following competing interests: JC, KP and LC are inventors of a patent related to Ecotin. The patent "Immunomodulating and immunostimulating polypeptides for drug-delivery" was filed on February 8, 2019 by the authors' National Research Council (CONICET) and the University of San Martin (UNSAM) in the United States patent and trademark Office (US2021009371), the European patent office (PCT/IB2019/051026, EP3749364), the China National intellectual property administration (CN111936166), and the National Institute of Intellectual Property from Argentina (AR114683). The filing of the patent did not have any role in experimental design, data collection and analysis, decision to publish, or preparation of this manuscript.

intracellular proteases. Here in this work, we show that Ecotin, a serine protease inhibitor, plays an important role in protecting *Salmonella* Typhimurium against proteases present at different sites encountered during oral infection: i) released by the pancreas into the gut lumen, ii) intracellular proteases from enterocytes and macrophages and iii) proteases from neutrophils. Our results indicate that Ecotin is an important virulence factor in *Salmonella* Typhimurium, adding another tool to the wide range of features this pathogen uses during oral infection.

## Introduction

*Salmonella* pathovars infect a wide variety of hosts and are associated with gastrointestinal or systemic diseases in humans [1,2]. Their success relies on their ability to fight the immune system and hijack the infected cells to persist and spread to other individuals [3–5]. According to the World Health Organization, non-typhoidal *Salmonella* serovars are among the leading causes of gastrointestinal diseases around the world [6,7] with *Salmonella enterica* serovar Typhimurium (STm) as a prevalent representative of this group.

As a food-borne pathogen, the main route of entrance of *Salmonella* is through the oral cavity, where it faces a harsh environment as it travels down the gastrointestinal tract. The changes in pH and the activity of gut proteases are not only directed to digest ingested food but also to degrade invading microorganisms in a non-specific fashion [8,9]. It has been shown that *Salmonella* has several mechanisms to survive under low pH conditions in the stomach [10] and in the *Salmonella* containing vacuole (SCV) of infected macrophages [11]. However, little is known about how it survives the action of gastrointestinal and intracellular proteases. *Salmonella* may synthesize protease inhibitors to hinder the proteolytic defense systems of the host and evade its responses against infections.

Ecotin is a protease inhibitor present in the genome of many gram-negative bacteria [12]. Its ability to inhibit a wide range of serine proteases was proven in *Escherichia coli* [13]. It can also protect *Escherichia coli* and *Pseudomonas aeruginosa* from neutrophil elastase [14,15]. In STm the *ecotin* gene is upregulated under stress conditions [16] and helps *Salmonella* Enteritidis to survive egg white microbicidal activity [17]. Despite all these findings, the possible relevance of Ecotin in the different environments that *Salmonella* confronts during infection remains unexplored. Given that proteases are found not only in the lumen of the gastrointestinal tract but also as part of the microbicide mechanisms used by the immune system to control pathogens [18–20], we speculated that Ecotin could protect bacteria in one or both situations. Thus, we studied if Ecotin allows STm to better survive through the hostile environment of the gastrointestinal tract and against macrophages and polymorphonuclear leukocytes, which are prepared to clear a potential infection.

## Results

### Ecotin has a role in STm induced colitis

To investigate the role of Ecotin in STm infection, the knock-out strain,  $\Delta ecotin$  ( $\Delta eco$ ) and the complemented strain ( $\Delta eco+eco$ ) were constructed in the STm 14028s wild type (WT) background. The identity of these strains was confirmed by PCR and western blot (S1A and S1B Fig). The *ecotin* deletion did not affect membrane permeability and bacterial growth since no differences were observed in N-phenyl-1-naphthylamine (NPN) uptake assays or bacterial growth curves between  $\Delta eco$  and WT strains (S1C and S1D Fig). To elucidate the role of *ecotin* during the gastrointestinal colonization, a mouse model of *Salmonella* induced colitis

was used [21]. In this model, the STm infection leads to the reduction of the cecum weight, the recruitment of polymorphonuclear leukocytes (PMNs) that transmigrate from the lamina propria to the gut lumen, the reduction in the number of Goblet cells with secretory vesicles and the loss of epithelial integrity. Mice infected with WT strain had a significant reduction of cecum weight at 24h post infection (p.i.) in comparison to mock-infected mice. However, this reduction was not evidenced upon infection with  $\Delta eco$  strain while the  $\Delta eco+eco$  strain rescued the WT phenotype (Fig 1A). Histopathological analysis was performed blinded (Fig 1B) and revealed that while the WT and  $\Delta eco+eco$  strains led to an increase in submucosa width (pronounced edema), mice infected with  $\Delta eco$  showed no differences compared to mock infected mice (Fig 1C). The three STm strains induced PMN infiltration (Fig 1D). A significant reduction of Goblet cells was exerted by WT and  $\Delta eco+eco$  but  $\Delta eco$  mutant failed to induce this reduction compared to mock infected mice (Fig 1E). The loss of epithelial integrity was analyzed, with a higher score indicating more damage suffered by the epithelium. Mice infected with the  $\Delta eco$  strain showed no differences in the score compared to the mock-infected animals, while the WT infected animals showed a higher score than mock-infected animals (Fig 1F). The  $\Delta eco+eco$  infected mice did not revert this effect. Altogether, these features revealed that  $\Delta eco$  infection elicited a lower inflammation than the WT strain and  $\Delta eco+eco$  rescued this attenuated phenotype (Fig 1G). This lower inflammation could be due to a reduced number of  $\Delta eco$  cells arriving at the gut epithelium. To test this hypothesis, mice were infected with WT or  $\Delta eco$  strains and 24h p.i. the bacterial counts were determined in both the cecal contents and the cecal epithelium using a gentamicin protection assay. The rationale for using gentamicin is related with the notion that the treatment with this antibiotic kills extracellular bacteria while intracellular bacteria survive [22]. The cecal contents were treated with PBS to assess total bacterial counts or gentamicin to search for differences in bacteria protected intracellularly inside suspended host cells. There was a reduction of ~10-fold in the recovered bacteria from  $\Delta eco$  strain compared to those from WT strain infected mice (Fig 1H, log (CFU) = 9.5 for WT vs 8.6 for  $\Delta eco$ ), whereas gentamicin protected bacteria inside host cells, were similar in  $\Delta eco$  or WT infected mice. In addition, ~10-fold lower bacterial counts were found inside the cecal tissues of  $\Delta eco$  infected mice than in those of WT infected mice (Fig 1I). Moreover, using a competitive assay in streptomycin pre-treated mice infected with a mixture of WT/ $\Delta eco$  or WT/ $\Delta eco+eco$  for 72h we found a fitness advantage for the WT over the  $\Delta eco$  strain in the cecum of mice which was rescued by the  $\Delta eco+eco$  strain indicating that Ecotin helps *Salmonella* to better thrive in that environment. As 72h could be used to study dissemination, the spleen of infected animals was analyzed but no difference was seen between WT and  $\Delta eco$  mutant indicating that the *eco* gene was dispensable for dissemination (S6A Fig). In order to confirm this result, a dissemination assay in BALB/c mice using a low dose of STm WT or  $\Delta eco$  was used and after 120h of infection animals were sacrificed and bacterial loads were determined in the spleen and liver. No differences were found in the bacterial loads between WT and  $\Delta eco$  strains (S6B Fig), confirming that the *eco* gene is dispensable for dissemination. Together, these data indicate that Ecotin in STm is important for inducing colitis. Lack of *ecotin* resulted in a reduction of pathogenicity that may be related to diminished bacterial counts in cecal content and decreased invasion of the gut epithelium.

### Ecotin protects STm against the action of pancreatic proteases

To investigate whether Ecotin is relevant for STm survival and replication in the presence of stomach proteases, WT and  $\Delta eco$  strains were incubated *in vitro* with purified pepsin from porcine gastric mucosa or buffer (pH=3). No differences in the bacterial count were found between the WT and  $\Delta eco$  strains either in buffer or with the addition of pepsin (Fig 2A). This result indicates that Ecotin is dispensable for STm survival during pepsin exposure while

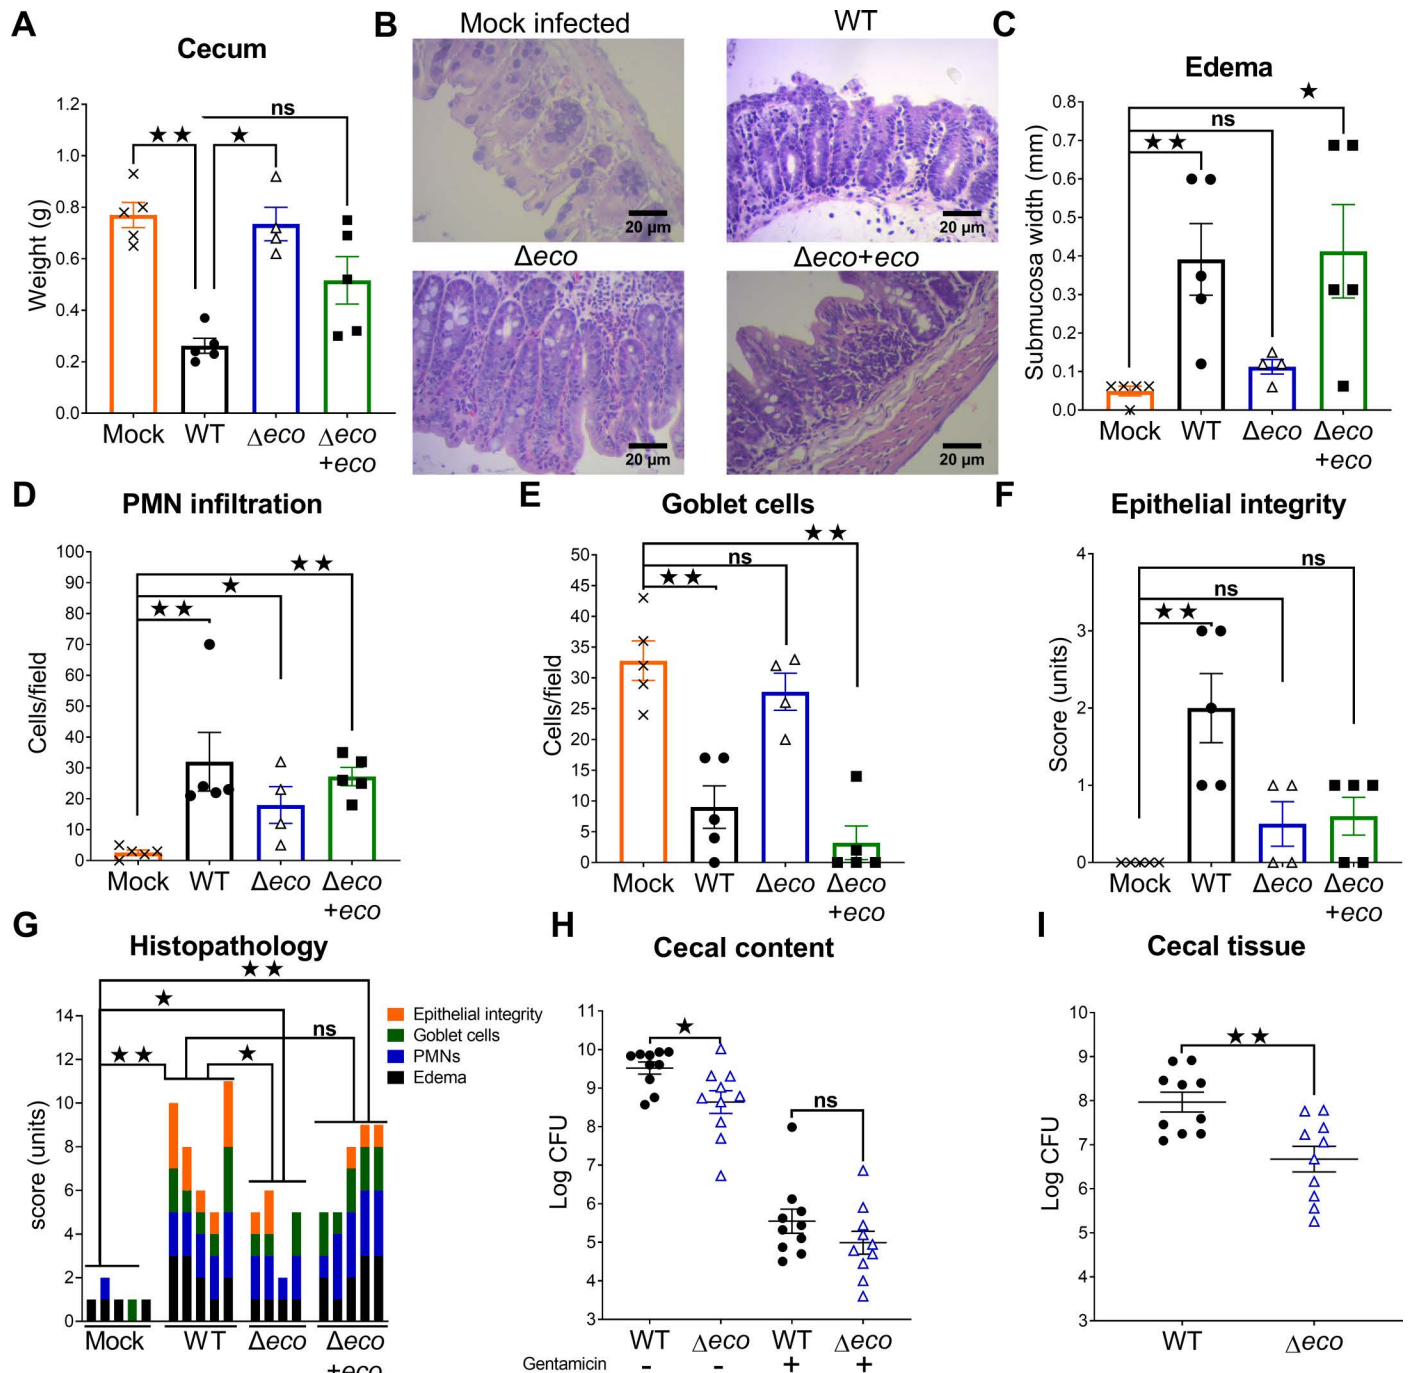

**Fig 1. Reduced inflammation in the streptomycin pre-treatment murine infection model induced by  $\Delta ecotin$  is associated with lower bacterial counts in the cecal epithelium.** Streptomycin pre-treated mice were orally infected with  $10^7$  CFU of WT (n=5),  $\Delta eco$  (n=4),  $\Delta eco + eco$  (n=5) strains, or mock infected with phosphate buffered saline (PBS) (n=5) and 24h p.i. were sacrificed. (A) Cecum was weighed separately for each mouse. Bars represent the mean  $\pm$  SEM. Each dot represents one mouse. Kruskal-Wallis test. (B) Histopathological sections of hematoxylin and eosin stained cecum tissue. Representative images of each group are shown. Histopathological parameters were scored: (C) edema of the submucosa, (D) infiltration of PMNs, (E) amount of Goblet cells with secretory vesicles, and (F) epithelial integrity. Bars represent mean  $\pm$  SEM. Each dot represents one mouse. (G) Combined score. Each bar represents an individual mouse. Mann-Whitney test. Data of one representative experiment from two independent experiments. (H-I) Streptomycin pre-treated mice were infected with  $10^7$  CFU of WT (n=10) or  $\Delta eco$  (n=10) and 24h p.i. mice were sacrificed. Cecal contents and cecal tissue were obtained. (H) A fraction of the cecal content was plated, and the other half incubated with gentamicin to kill extracellular bacteria, then bacterial counts were determined. The mean  $\pm$  SEM is shown. Mann-Whitney test. (I) Bacterial counts were determined in cecal tissue. The mean  $\pm$  SEM is shown. Pooled data from two independent experiments. Each dot represents one mouse. Mann-Whitney test. ns  $p > 0.05$ , \* $p < 0.05$ , \*\* $p < 0.01$ .

<https://doi.org/10.1371/journal.ppat.1013013.g001>



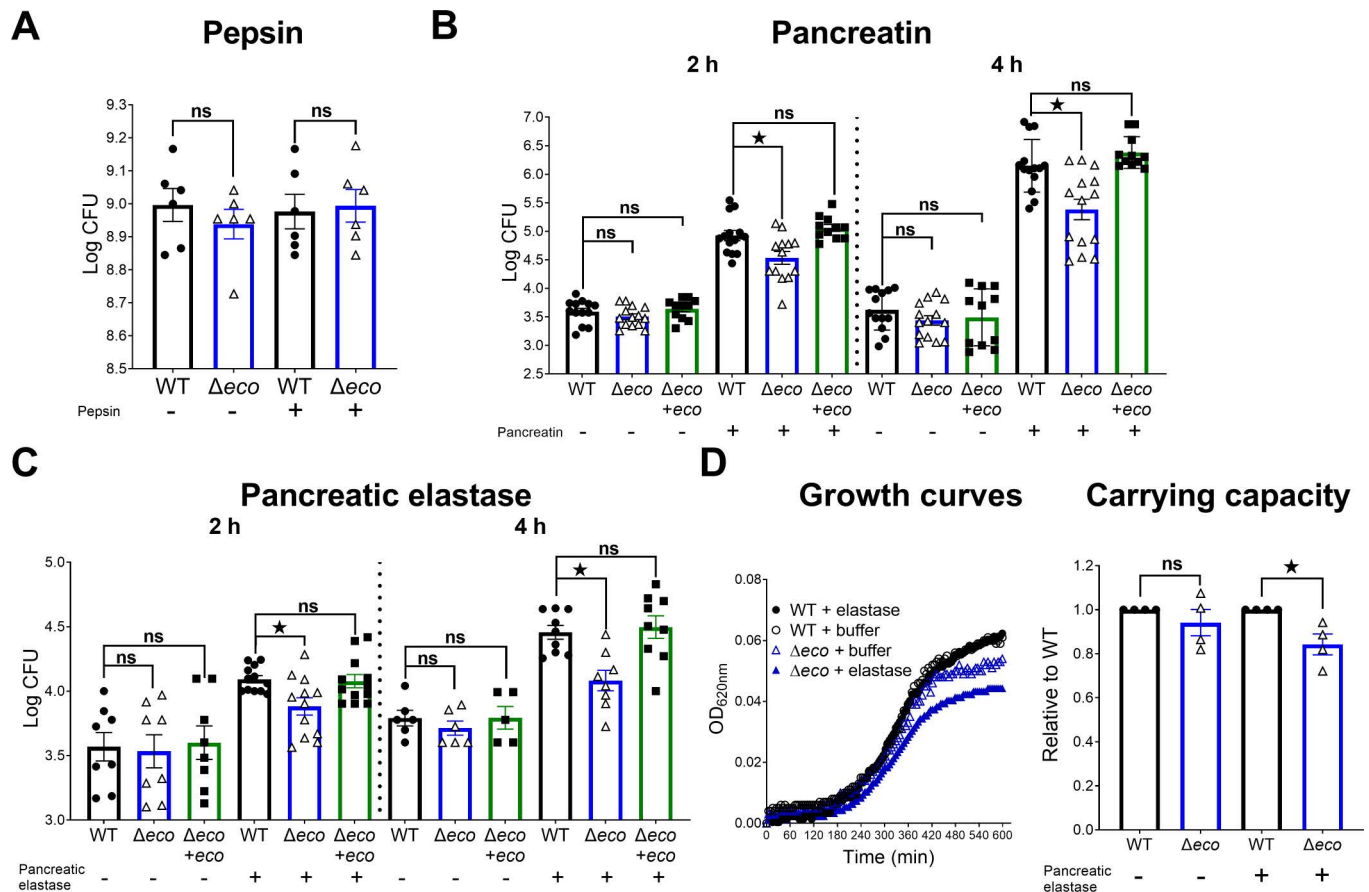

**Fig 2. *Ecotin* allows STm to survive against pancreatic proteases.** WT,  $\Delta eco$  and  $\Delta eco + eco$  were incubated with (A) pepsin or buffer (pH=3), (B) pancreatin (a complex mixture of enzymes from porcine pancreas) or buffer (pH=7) and (C) pancreatic elastase or buffer (pH=8.8). Bars represent the mean  $\pm$  SEM. Data pooled from at least 3 independent experiments. Dots represent technical replicates. Mann-Whitney test for (A) and Kruskal-Wallis test (B-C).  $nsp > 0.05$ ,  $*p < 0.05$ . (D) WT and  $\Delta eco$  strains were incubated with pancreatic elastase or with buffer alone, both conditions supplemented with LB and growth was monitored using a microplate reader. The growth curves were plotted and the carrying capacity was calculated and normalized by the WT strain. Bars represent mean  $\pm$  SEM. Dots represent independent experiments. Mann-Whitney test.  $nsp > 0.05$ ,  $*p < 0.05$ .

<https://doi.org/10.1371/journal.ppat.1013013.g002>

travelling through the stomach. After leaving the stomach, enteric pathogens reach the intestine where they encounter pancreatic proteases. The indicated strains were incubated with buffer (pH=7) or pancreatin. Incubation with buffer alone showed no differences between WT,  $\Delta eco$  and  $\Delta eco + eco$  strains, while the addition of pancreatin resulted in a significant ~50% (2h) and ~75% (4h) reduction of the bacterial count of  $\Delta eco$  compared to WT strain (Fig 2B). This increased susceptibility of  $\Delta eco$  was reverted by  $\Delta eco + eco$ . The susceptibility of  $\Delta eco$  to pancreatic proteases was further studied using purified porcine pancreatic elastase, which is present in pancreatin. Incubation with buffer (pH=8.8) showed no differences between the strains, while the addition of pancreatic elastase led to significant ~35% (2h) and ~40% (4h) reductions of the bacterial count for  $\Delta eco$  compared to the WT strain (Fig 2C). Importantly, the  $\Delta eco + eco$  strain rescued the observed phenotype. In addition, bacterial growth was monitored during buffer or pancreatic elastase incubation using a microplate reader. The addition of pancreatic elastase did not affect the WT strain growth curves, while the  $\Delta eco$  strain showed a lower plateau in the stationary phase after pancreatic elastase incubation in comparison to the buffer condition (Fig 2D). Evaluation of the relative carrying capacity, a parameter related to the bacterial counts reached in stationary phase, revealed that addition of pancreatic

elastase led to a significant ~15% reduction in the carrying capacity in  $\Delta eco$  compared to the WT strain (Fig 2D). As the indicated strains growth in LB and LB-NaCl 0.3M was similar (S1D Fig), the lower OD<sub>620nm</sub> reached by  $\Delta eco$  in the curves with pancreatic elastase indicated an antimicrobial effect of this protease. Taken altogether, these results indicate that expression of Ecotin in STm plays a protective role against proteases of the gut lumen.

### STm *Δecotin* is more susceptible to the proteolytic activity of brush border membranes and has impaired adhesion to human intestinal cell lines

Upon arriving at the gut, *Salmonella* must overcome the intestinal epithelial barrier where it may confront secreted brush border proteases. Thus, Ecotin capacity to inhibit the proteolytic activity of brush border membranes (BBM) from mouse intestines was tested using casein-BODIPY, a substrate that yields a fluorescent product upon digestion. BBM caused fluorescence to rapidly increase due to casein-BODIPY digestion. In contrast, BBM in the presence of recombinant purified Ecotin (rEcotin) from STm or a commercial protease inhibitor cocktail (PIC) reduced the rate of fluorescence accumulation in a dose dependent manner (Fig 3A). Adhesion and invasion assays using HT-29 or Caco-2 human intestinal cell lines were performed. The adhesion of  $\Delta eco$  strain to HT-29 or Caco-2 monolayers was ~60% and ~75% lower than the WT strain respectively, while  $\Delta eco+eco$  rescued this phenotype in both cases (Fig 3B). In contrast, no differences were found in invasion capacity between the indicated strains (S2E and S2F Fig). The adhesion defect of  $\Delta eco$  was confirmed by confocal microscopy (Fig 3C) as there were significantly fewer  $\Delta eco$  bacteria adhered to Caco-2 monolayers than the WT strain (Fig 3D). Moreover, in competitive experiments, bacterial adhesion was lower for  $\Delta eco$  in both cell lines compared to WT strain (Fig 3E), whereas the  $\Delta eco+eco$  strain reverted the phenotype. Together, these data suggest that the absence of Ecotin in STm results in a loss of fitness for adhesion to the intestinal epithelium. This impaired adhesion was not due to differences in bacterial swimming and arrival to the monolayers as these strains had no differences in motility (S1E Fig). In addition, a centrifugation step to force the bacteria onto the monolayers led to an increase in total adhesion but maintained the attenuated phenotype for  $\Delta eco$  (S2A and S2B Fig). Also, Triton X-100 used to lyse the monolayers before dilution and plating did not affect bacterial counts (S2C Fig). These results suggested that the attenuated phenotype observed for the  $\Delta eco$  strain is at least partially attributable to a deficient interaction of bacteria with epithelial cells because of the protease inhibitor activity on BBM exerted by Ecotin. To test this hypothesis, adhesion assays were performed pre-incubating Caco-2 monolayers with rEcotin or PIC. Incubation of monolayers with rEcotin did not affect the WT strain adhesion index, while pre-incubation of cells with rEcotin or with PIC restored the adhesion index of  $\Delta eco$  mutant to the WT levels (Fig 3F). These data indicate that Ecotin is important for *Salmonella* in the process of adhesion to intestinal epithelial cells.

### STm *Δecotin* is more susceptible to lysosomal proteolytic content and has impaired intracellular replication in murine macrophages

STm infects macrophages, which allow bacteria to disseminate to other tissues. To study the possible contribution of Ecotin to bacterial intracellular survival and replication in macrophages, the murine macrophage J774 cell line was infected with the different STm strains. There were no differences in invasion capacity between the strains (Fig 4A). However, the  $\Delta eco$  mutant had a significantly ~50% reduction in intracellular replication after 4h p.i. compared to the WT strain and this phenotype was rescued by  $\Delta eco+eco$  complementation (Fig 4B). The contribution of Ecotin to intracellular replication was also demonstrated in competitive assays, no differences in invasion between  $\Delta eco$  and WT strain were observed, while a

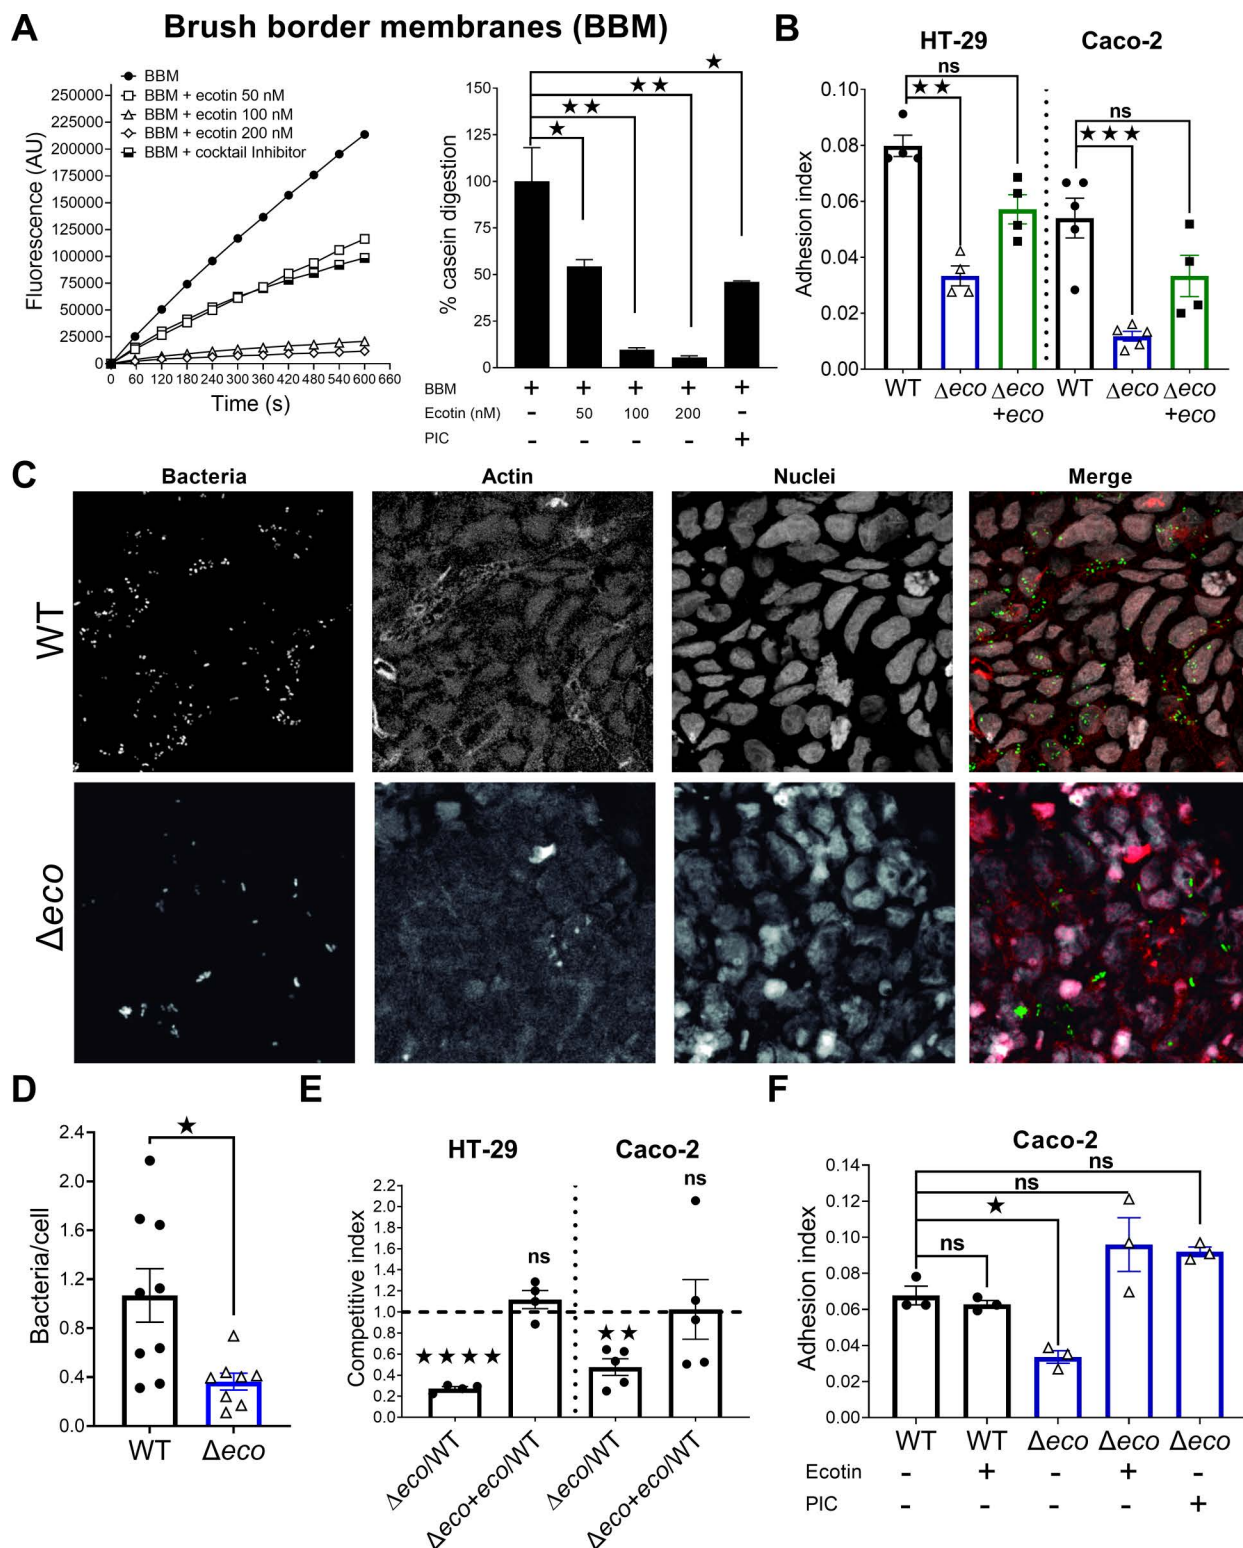

**Fig 3. Impaired adhesion of the  $\Delta ecotin$  strain to Caco-2 and HT-29 epithelial cell monolayers.** (A) Purified brush border membranes were co-incubated with casein-BODIPY (fluorogenic substrate) and buffer, different concentrations of recombinant Ecotin or PIC (positive control). Casein digestion was followed by fluorescence determination. The % casein digestion was calculated as percentage of the slopes of Fluorescence over time curves for each treatment compared with the buffer alone condition (100% casein digestion). Bars represent the mean  $\pm$  SEM. Student's

t-test.  $*p<0.05$ ,  $**p<0.01$ . (B) Adhesion assay in HT-29 or Caco-2 cell line monolayers. Cells were incubated with WT,  $\Delta eco$  and  $\Delta eco+eco$  strains for 30min, washed, bacterial count determined and normalized to inoculum (adhesion index). Bars represent the mean $\pm$ SEM. Dots are technical replicates. Representative of three independent experiments. Kruskal-Wallis test.  $nsp>0.05$ ,  $**p<0.01$ ,  $***p<0.001$ . (C-D) Adhesion assay: Caco-2 cell line monolayers were incubated for 30min with WT or  $\Delta eco$  strains carrying GFP expressing plasmid (green). Actin filaments were stained with phalloidin (red) and nuclei were stained with Topro-3 (white). Bacteria in random fields were counted and normalized by the number of nuclei per field. Bars represent the mean $\pm$ SEM. Dots are random fields. Pooled data from two independent experiments. Mann-Whitney test.  $*p<0.05$ . (E) Competitive adhesion assay performed in HT-29 or Caco-2 cell line monolayers. The competitive index was calculated as the ratio in bacterial count after 30min of infection corrected by the ratio in the inoculum. Bars represent mean $\pm$ SEM. Dots are technical replicates. Representative of at least two independent experiments. One-sample t-test vs 1.  $nsp>0.05$ ,  $**p<0.01$ ,  $***p<0.0001$ . (F) Adhesion assays in Caco-2 were repeated with the pre-treatment of the indicated wells with recombinant Ecotin 1  $\mu$ M or PIC for 5min before the addition of bacteria. Bars represent the mean $\pm$ SEM. Dots are technical replicates. Representative of two independent experiments. One-way ANOVA.  $nsp>0.05$ ,  $*p<0.05$ .

<https://doi.org/10.1371/journal.ppat.1013013.g003>

significant fitness advantage for WT strain over the  $\Delta eco$  mutant was observed at 4h p.i. (Fig 4C). To evaluate if the observed results were linked to differences in growth rates, the TIM-ER<sup>bac</sup> plasmid was used as a growth rate reporter for *Salmonella* [23]. Thus, J774 macrophages were infected with WT or  $\Delta eco$  strains carrying TIM-ER<sup>bac</sup> and confocal microscopy analysis was performed. There were no differences in the green/orange fluorescence ratio between  $\Delta eco$  and WT strains at invasion, but the  $\Delta eco$  mutant showed a significantly lower ratio at 4h p.i. than the WT strain (Fig 4D). These results suggest that  $\Delta eco$  intracellular growth is limited in macrophages. To further study this phenomenon, the intracellular trafficking of  $\Delta eco$  and WT strains was studied. Recruitment of lysosome-associated membrane protein 1 (LAMP-1), a late endosome marker, related to the maturation of the SCV [24,25] was evaluated. The  $\Delta eco$  mutant recruited significantly more LAMP-1 at the invasion time point than the WT strain (36% $\pm$ 3% vs 24% $\pm$ 3%), but this difference was abolished at 4h p.i., showing a distinctive intracellular traffic dynamic for  $\Delta eco$  mutant (Fig 4E and 4F). To assess the role of Ecotin against the lysosomal proteolytic content, J774 derived microsomes with demonstrated proteolytic activity (S3A Fig) were incubated with the  $\Delta eco$  mutant or the WT strain. There were no differences between  $\Delta eco$  and WT strains when incubated with buffer, however a ~40% reduction of relative bacterial counts for  $\Delta eco$  mutant was observed compared to the WT strain after incubation with microsomes (Fig 4G). In this context, the lower intracellular replication found at 4h p.i. could be due to an impaired ability of the  $\Delta eco$  mutant to survive against the action of intracellular proteases. These results show that Ecotin is an important virulence factor of STm for establishing a replicative niche in macrophages.

### Ecotin protects STm from the proteolytic microbicide activity of human PMNs

PMNs recruitment is a hallmark of STm induced colitis and these cells are the main immune system cells that fight and clear *Salmonella* infection [26]. Here, we found that STm WT and  $\Delta eco$  strains show no differences in PMNs recruitment compared to PBS (Fig 1D) and both strains recruited PMNs similarly after peritoneal infection in mice (S7 Fig). As it was shown that Ecotin from *Escherichia coli* and *Pseudomonas aeruginosa* were able to inhibit neutrophil elastase [14,15] we wanted to corroborate the inhibitory capacity of STm Ecotin against it. Using recombinant Ecotin, we confirmed that it inhibits neutrophil elastase activity in a dose dependent manner (Fig 5A). To test if Ecotin could be involved in bacterial survival against PMN proteolytic microbicidal activity, purified human PMNs were co-incubated with the different *Salmonella* strains. Human PMNs were able to similarly kill WT,  $\Delta eco$  and  $\Delta eco+eco$  strains resulting in a ~50% survival. However, when the oxidative dependent microbicidal activity was inhibited by adding DPI (diphenyleneiodonium) (S4E Fig) to PMNs prior to infection,  $\Delta eco$  strain was more susceptible than the WT strain (Fig 5B). This effect was reverted by



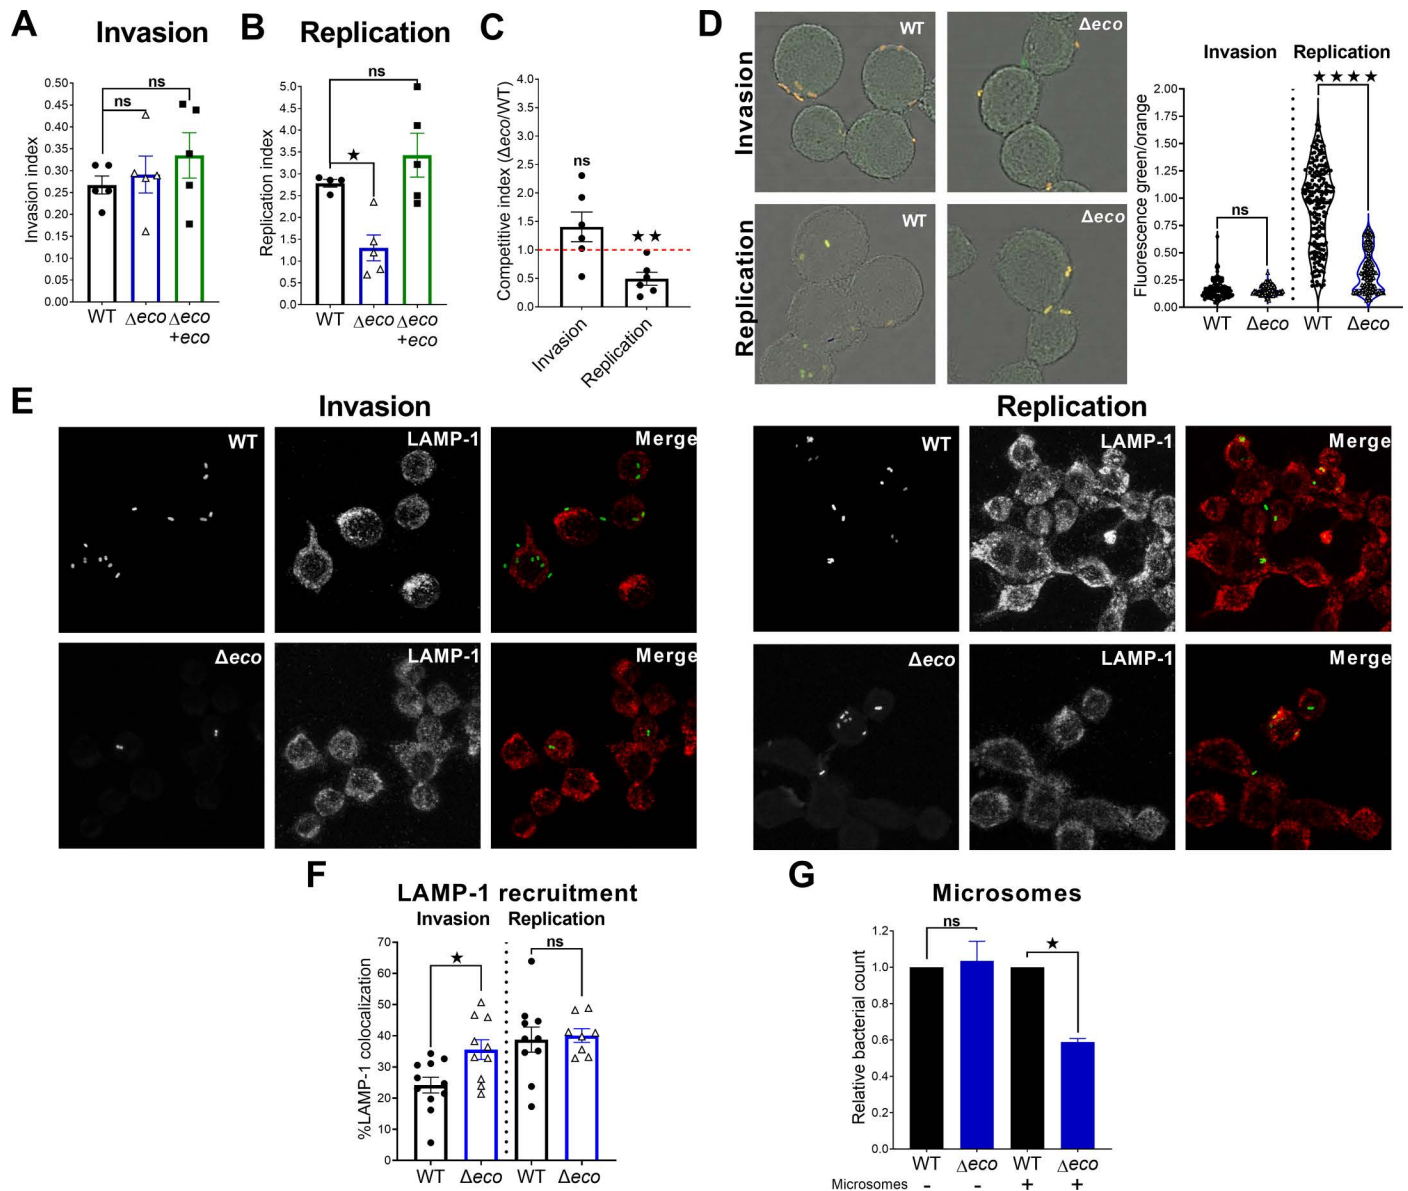

**Fig 4. Δecotin has attenuated intracellular replication in murine macrophages and is more susceptible to the action of intracellular proteases.** (A) J774 macrophages were incubated with WT, Δeco or Δeco+eco strains for 30min. Then, cells were treated with gentamicin for 1h, washed, lysed and bacterial counts determined. Bacterial counts were normalized by the inoculum (invasion index). Bars represent the mean±SEM. Dots are technical replicates. Representative of three independent experiments. One-Way ANOVA with Bonferroni post-test.  $nsp>0.05$ . (B) Cells were infected as in A, but incubated for a further 3h before washing and bacterial counts determination. The bacterial counts at this time point were then normalized by the bacterial counts in the invasion time point (replication index). Bars represent the mean±SEM. Dots are technical replicates. Representative of three independent experiments. One-Way ANOVA with Bonferroni post-test.  $nsp>0.05$ ,  $**p<0.01$ . (C) Competitive assay performed in J774 macrophages. The competitive index was calculated as the ratio between Δeco/WT recovered at the invasion time point or 4h time point corrected by inoculum or invasion ratio respectively. Bars represent the mean±SEM. Dots are technical replicates. Representative of three independent experiments. One-Sample t-test vs 1.  $nsp>0.05$ ,  $**p<0.01$ . (D) J774 macrophages were infected with WT or Δeco strains carrying a TIMER<sup>bac</sup> plasmid and fluorescence intensity was analyzed by confocal microscopy. The ratio of green/orange fluorescence of TIMER<sup>bac</sup> indicates the growth rate of *Salmonella*, slow-growing cells appear orange/red and faster growing cells are greener. Bars represent the mean±SEM. Dots represent individual bacteria from at least 10 random fields. Pooled data from two experiments. Mann-Whitney test.  $nsp>0.05$ ,  $****p<0.0001$ . (E-F) J774 macrophages were infected with WT or Δeco strains expressing GFP, then cells were fixed and labeled with a primary anti LAMP-1 antibody and a secondary antibody coupled with AlexaFluor647. Colocalization was analyzed in random fields using Manders approach to measure LAMP-1 recruitment. Bars represent the mean±SEM. Dots are random fields pooled from two experiments. Student's t-test.  $nsp>0.05$ ,  $*p<0.05$ . (G) Microsomes from J774 macrophages or buffer were co-incubated for 2h with WT or Δeco strains. The bacterial count was normalized by WT strain. Bars represent the mean±SEM. Pooled data from two experiments. Student's t-test.  $nsp>0.05$ ,  $*p<0.05$ .

<https://doi.org/10.1371/journal.ppat.1013013.g004>

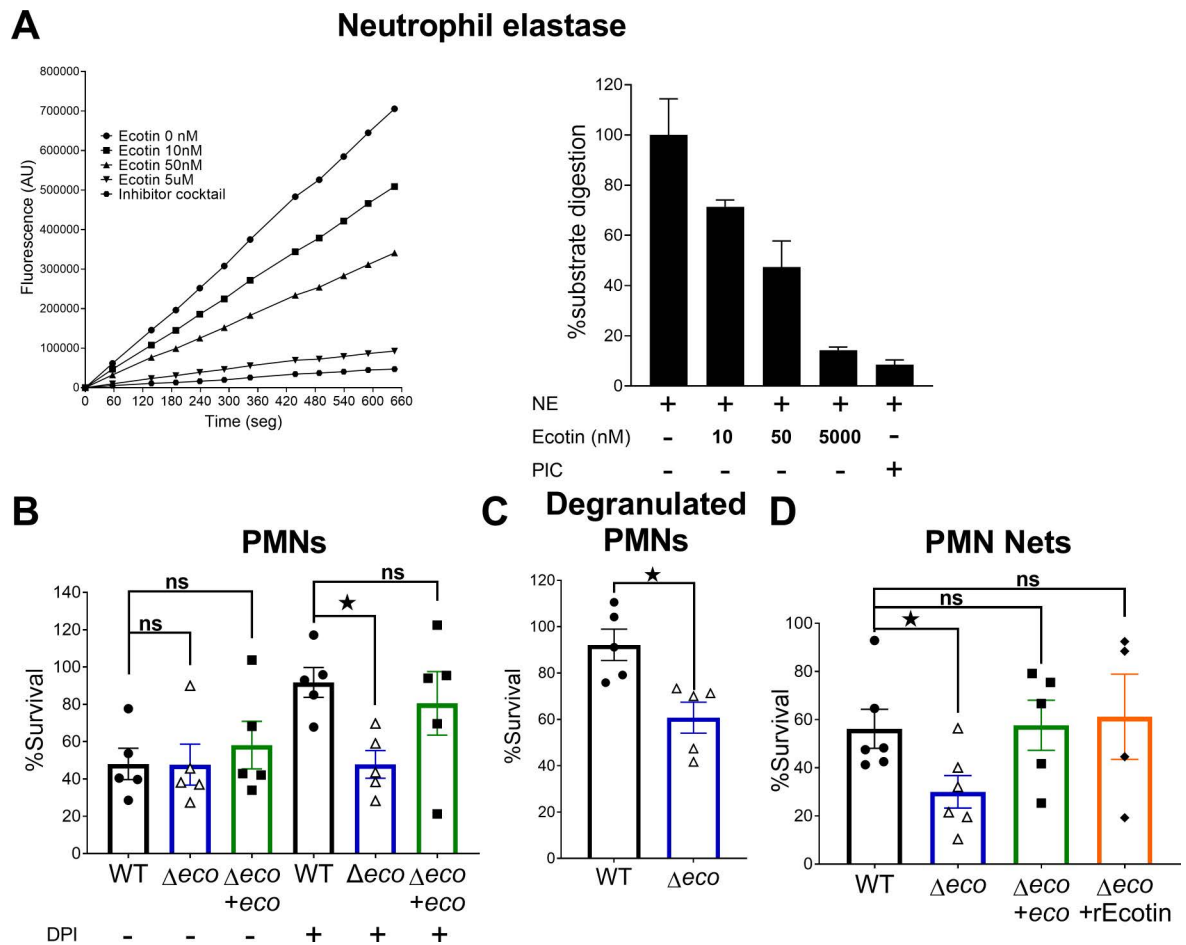

**Fig 5. Ecotin protects STm from the proteolytic microbicidal activity of human PMNs.** (A) Neutrophil elastase (NE) was incubated with a fluorogenic substrate and different concentrations of recombinant Ecotin or a commercial protease inhibitor cocktail (PIC). Protease activity was measured over time using a fluorescence microplate reader. The percentage of substrate digestion was calculated as the percentage of fluorescence vs. time slope regarding the condition without inhibitor (0nM) (100% substrate digestion). (B) Purified human PMNs were incubated with WT,  $\Delta eco$  or  $\Delta eco+eco$  strains in the presence or absence of DPI and after 90min bacterial counts were determined and normalized to bacteria incubated without neutrophils (100% Survival). Bars represent the mean $\pm$ SEM. Dots are individual donors. One-way ANOVA with Bonferroni post-test.  $nsp>0.05$ ,  $*p<0.05$ . (C) Degranulation was induced in purified human PMNs and the degranulated supernatant was incubated with WT or  $\Delta eco$  strains. After 90min of incubation the bacterial counts were determined and normalized to bacteria incubated without degranulated supernatant (100% Survival). Bars represent the mean $\pm$ SEM. Dots are individual donors. Student's t-test.  $*p<0.05$ . (D) Neutrophil extracellular traps (NETs) were induced in purified human PMNs and the supernatant containing the NETs was incubated with WT,  $\Delta eco$ ,  $\Delta eco+eco$  strains or  $\Delta eco$  supplemented with recombinant Ecotin ( $\Delta eco+rEcotin$ ). Then, 90min after incubation, the bacterial counts were determined and normalized to bacteria incubated without NETs (100% Survival). Bars represent the mean $\pm$ SEM. Dots are individual donors. One-way ANOVA with Bonferroni post-test.  $nsp>0.05$ ,  $*p<0.05$ .

<https://doi.org/10.1371/journal.ppat.1013013.g005>

$\Delta eco+eco$ . In addition, the  $\Delta eco$  strain was more susceptible than the WT strain to the killing activity of supernatants of degranulated PMNs, with a ~40% reduction in survival (Fig 5C), or to the killing by purified neutrophil extracellular traps (NETs), with roughly ~50% reduction in survival compared to WT strain (Fig 5D), both with confirmed neutrophil elastase activity (S4A and S4B Fig) and DNA content in the case of NETs (S4C and S4D Fig). The  $\Delta eco+eco$  strain reverted the effect of NETs to WT levels and remarkably, the addition of rEcotin to the NETs restored the survival of  $\Delta eco$  strain to the WT levels (Fig 5D). These results highlight the importance of Ecotin for STm survival to the PMNs proteolytic microbicidal activity.

## Discussion

STm infection in humans causes a diarrheal illness characterized by acute intestinal inflammation and the presence of neutrophil infiltration [27]. In mice, the streptomycin pre-treated model resembles many features of human gastroenteritis [21]. The inflammation induced by STm, far from killing the pathogen, creates a suitable niche for bacterial replication [28–30]. Our findings indicate that *ecotin* plays a role in *Salmonella* induced gastrointestinal inflammation, since STm lacking the *ecotin* gene induced an attenuated inflammation in infected mice.

Recruitment of PMNs into and across the gut mucosa is a cardinal feature of intestinal inflammation in response to STm infection and it has been shown that intraluminal PMNs protect the cecal epithelium from STm induced loss of integrity [31]. Here, we found that Ecotin was dispensable for PMN recruitment. The reduced inflammation observed could be related to fewer bacterial counts of  $\Delta eco$  in either the cecum lumen or invading the epithelium.

In previous studies, it was shown that bacterial protease inhibitors were important for *in vitro* survival as well as to establish infection *in vivo* [32]. The STm Ecotin protein is exported to the periplasm via the signal peptide in its sequence (S5A Fig). Given its periplasmic location, Ecotin may be helping STm to defend against proteases present in the gastrointestinal tract.

We demonstrated that knocking out the *ecotin* gene rendered bacteria susceptible to proteolysis by pancreatin and pancreatic elastase. Similar to our findings, it was shown that Ecotin from *Campylobacter rectus* and *Campylobacter showae* rescued *Campylobacter jejuni*  $\Delta pglB$  from proteolysis of chicken cecal contents [33]. Our findings indicate that Ecotin protects *Salmonella* against the proteolytic activity of gut luminal proteases.

Another important source of proteases is the brush border of the small intestine, which degrades proteins and other nutrients in a non-specific fashion [34]. Here, we have shown the ability of Ecotin to inhibit the proteolytic activity of mice purified BBM.

After swimming and sensing the surface, *Salmonella* establishes the infection by invading epithelial cells [35,36]. The initial adhesion is critical to allow the bacterial invasion machinery to inject effectors into the host cell cytoplasm in order to promote its own endocytosis [37]. We demonstrated that the  $\Delta eco$  strain exhibited lower adhesion to HT-29 and Caco-2 cell lines than the WT strain. Moreover, this phenotype was rescued upon pre-incubation of cell monolayers with Ecotin or a PIC. These results suggest that Ecotin could be inhibiting at least one brush border protease whose biological activity may impair the adhesion of STm. We then propose that the intestinal brush border enzymes have a role in keeping the pathogen at bay.

Our results also demonstrated that Ecotin is required for survival and replication inside macrophages. Similar attenuated replication was found for a  $\Delta eco$  mutant in *Burkholderia pseudomallei* in macrophages [38]. Once inside the macrophage, *Salmonella* changes its gene expression program to form the SCV and to shift to intracellular adaptation [39–41]. This shift made by *Salmonella* is within the phagolysosomal pathway, which is modulated by the bacteria to evade antimicrobial activity. The recruitment of LAMP-1 is typical of an intermediate to late stage of the SCV formation [42]. Interestingly, we found an altered dynamic of LAMP-1 recruitment, indicating a faster maturation for SCV containing the  $\Delta eco$  mutant inside macrophages. This suggested a role for Ecotin in the SCV and phagolysosome maturation dynamics. In addition, the susceptibility of  $\Delta eco$  to macrophage-derived microsomes could explain the hampered intracellular replication of the  $\Delta eco$  mutant in this cell type. Macrophages try to kill and digest engulfed bacteria using a wide array of antimicrobial peptides, organic acids, proteases, low pH, and ROS [20,43–46]. It has been demonstrated that murine macrophages impair STm intracellular replication by CRAMP, an antimicrobial peptide, in a serine-protease-dependent manner [47]. Also, Perforin-2 from murine macrophages, induce the formation of pores in the outer membrane of engulfed *Salmonella*. Thus, it allows the entrance of

antimicrobial peptides and proteases to the periplasmic space of bacteria [48]. Consequently, the breach in the outer membrane takes the battlefield to the periplasm where Ecotin could protect *Salmonella*'s proteins from proteolysis of invading proteases. These results highlight the importance for *Salmonella* to have periplasmic protease inhibitors to defend against the host proteases while running against the clock to establish a replicative niche inside macrophages.

STm hides inside macrophages and epithelial cells to escape from PMNs killing activity [49]. Our experiments co-incubating STm and PMNs showed that abrogation of ROS-dependent microbicidal mechanisms by DPI abolished the ability of PMNs to kill the STm WT strain but not  $\Delta eco$ . Under these circumstances, the  $\Delta eco$  had reduced survival when co-incubated with PMNs, indicating that inhibiting proteases could be important for survival at any time when ROS does not dominate.

PMNs have different ways of killing pathogens; phagocytosis and digestion, release of granules and NETs, each of these using ROS, antimicrobial peptides or proteases as effectors of antimicrobial activity [19,50]. NETs consist of PMN content using DNA as a trap, together with active neutrophil elastase, and myeloperoxidase [51]. Here, we found that Ecotin is important for STm to survive both PMN killing mechanisms, granule contents and NETs. Similar results were found for *ecotin* from *Campylobacter rectus* and *Campylobacter showae* [33]. We also found that the addition of rEcotin to the NETs prior to the incubation with the  $\Delta eco$  strain reverted the phenotype to WT levels. In previous work it was demonstrated that rEcotin from STm can inhibit neutrophil elastase present in purified PMNs [52]. Here we show that rEcotin from STm can inhibit purified neutrophil elastase. This reinforced the idea that inhibition of proteases, presumably neutrophil elastase, in the NETs or granules augmented bacterial survival. Thus, our data indicate that Ecotin is a defense mechanism in STm against the antimicrobial activity of PMN serine proteases.

In summary, we demonstrated for the first time, the importance of a protease inhibitor in STm as a key protein for defending bacteria against the host proteolytic defense system. Our experiments demonstrated the ability of Ecotin to inhibit proteolytic activity in different environments *Salmonella* encounters as it develops infection.

## Materials and methods

### Ethics statement

The participation of human blood donors was reviewed and approved by Central Ethical Committee of the Buenos Aires Province (ACTA-2023-08191112-GDEBA-CECMSALGP). Written informed consent to participate in this study was provided by the participants. Animal protocols of this study were approved by the Institutional Committee for the Care and Use of Experimentation Animals from UNSAM (CICUAE-UNSAM\_N°17/2018). Protocols of this study agreed with international ethical standards for animal experimentation (Helsinki Declaration and amendments, Amsterdam Protocol of Welfare and Animal Protection and NIH guidelines for the Care and Use of Laboratory Animals).

### Bacterial strains and growth conditions

The STm strains, plasmids and primers used in this study are listed in S1 Table. The  $\Delta ecotin$  strain was constructed as described [53] and transduced into a clean WT background using the p22 phage ( $\Delta eco$ ). The primers EcotinFPcomplete and EcotinRVcomplete were used for amplification of the *ecotin* gene region for cloning into pWSK29 plasmid. Then, complementation was made by electroporation of the pWSK29 plasmid containing the *ecotin* gene in the  $\Delta eco$  strain ( $\Delta eco+eco$ ). Single colonies were grown overnight in LB (37°C, agitation). Next, diluted in LB-NaCl 0.3M and



incubated further (37°C, 100rpm) to mid-exponential phase. If necessary, media or agar plates were supplemented with antibiotics (kanamycin 60µg/mL, ampicillin 100µg/mL).

### ***Salmonella* colitis induced mouse model**

Female BALB/c mice (6–9 weeks old) were bred at IIB-UNSAM and orally infected as described previously [21]. At 24h p.i., mice were sacrificed, and ceca were aseptically collected. In some experiments, ceca were weighed, and a section was suspended in 4% paraformaldehyde (PFA) (Sigma) for histopathological analysis by pathologists in a blinded manner according to previously described score guidelines [21]. In other experiments cecal contents were obtained, fractioned, and treated (30min, 37°C) with PBS (total bacterial counts) or gentamicin 400µg/mL (bacteria inside suspended cells). Then, fractions were centrifuged at 10000×g (10min), washed twice with PBS, and plated on agar-SS (Britannia). The cecal epithelium was opened, washed with PBS and incubated with gentamicin 100µg/mL (1h, 37°C). Then, washed twice with PBS, centrifuged 3000×g (5min), suspended in PBS, homogenized and plated on agar-SS.

### **Proteases susceptibility assay**

STm strains ( $1 \times 10^5$  CFU) were incubated with pepsin (3mg/mL, Sigma) or buffer for 30min, pancreatin (2mg/mL, Sigma), pancreatic elastase (5µM, Sigma) or buffer (negative control) for 2h or 4h (37°C). Buffers were: NaCl 125mM, KCl 7mM, NaHCO<sub>3</sub> 45mM, pH=3 (pepsin), 0.5% NaCl (pancreatin) or Tris-HCl 10mM, pH=8.8 (pancreatic elastase). Bacterial counts were determined by serial dilutions and plating. Bacterial counts were calculated at each time point/condition. To study growth kinetics of STm strains in presence of pancreatic elastase, WT or  $\Delta eco$  were incubated with buffer or pancreatic elastase as described above plus 9% LB in a microplate reader (Tecan) with agitation (37°C). The OD<sub>620nm</sub> was recorded at 5min intervals. Growth curves were analyzed using the GrowthCurver R package [54]. The carrying capacity, which is the maximum size that a given population can reach in a particular environment, was obtained for each individual curve from the adjusted model used by the GrowthCurver. Then, the values were normalized by the carrying capacity of the WT strain in each experiment.

### **Brush border membranes preparation and casein digestion inhibition**

BBM were obtained by MgCl<sub>2</sub> precipitation as previously described [55]. For BBM inhibition assays, BBM were incubated with buffer (PBS), Ecotin or PIC using casein-BODIPY (Life-Technologies) 1µg/mL as substrate. Substrate-cleavage led to fluorescence release that was determined (FilterMaxF5, Molecular-Devices). The slopes of linear parts of the curves were normalized by the buffer condition and the percentage of casein digestion was calculated.

### **HT-29 and Caco-2 adhesion and competitive assays**

Caco-2 and HT-29 were cultured in RPMI (Gibco) supplemented with 10% heat-inactivated fetal bovine serum, 1mM sodium pyruvate (Sigma), 2mM L-glutamine (Sigma), 100U/mL penicillin (Sigma) and 100 µg/mL streptomycin (Sigma) as previously described [55]. Cells from passages 5–25 were used and seeded ( $5 \times 10^4$  cells/well) in 24-well plates (Sarstedt) and allowed to reach polarization [56]. The last media change before experiments was done without antibiotics. Infections were performed with  $1 \times 10^7$  CFU/mL in RPMI for 30min (37°C). Then, monolayers were washed four times using 0.9% NaCl and disrupted with 0.1% Triton X-100. Serial dilutions were performed and plated. The adhesion index was calculated as CFU/mL 30min p.i. divided by CFU/mL in the inoculum. In some experiments, Caco-2

monolayers were pre-incubated with rEcotin or PIC (5min) before infection. For competitive assays, Caco-2 or HT-29 monolayers were incubated with bacteria as described above but using a 1:1 mix of WT: $\Delta eco$  or WT: $\Delta eco+eco$ . Bacterial strains were distinguished using different antibiotics. The ratios of  $\Delta eco$ /WT and  $\Delta eco+eco$ /WT after 30min of incubation were divided by the ratios in their respective inocula to obtain the competitive index.

### Confocal microscopy of Caco-2

STm strains carrying the pNCS-mClover3 plasmid were used for adhesion assays in Caco-2 cells grown on coverslips. Monolayers were washed and fixed with 4% PFA, permeabilized and stained (PBS, 0.2% Triton X-100, 5% BSA, Alexa-Fluor488 phalloidin and Topro-3) for 30min. Then, coverslips were washed with water and mounted onto glass slides using Fluorsave (Merck). Random fields were acquired using an IX-81 Olympus microscope with FV-1000 confocal module. Bacteria and Caco-2 nuclei were counted using Icy Microscopy Software, and the bacteria/nuclei ratios were calculated per field. The pNCS-mClover3 was a gift from Michael Lin (Addgene-plasmid #74236).

### J774 invasion, replication and competitive assays

J774 macrophages were cultured in RPMI as described for Caco-2. Cells ( $10^5$  cells/well) were allowed to attach in 24-well plates (24h) without antibiotics. Then, macrophages were washed with PBS and incubated with the different STm strains (MOI:50, 30min), washed twice and treated with gentamicin (100 $\mu$ g/mL, 1h). Afterwards, cells were washed twice and lysed with 0.1% Triton X-100 (invasion) or further incubated with gentamicin 20 $\mu$ g/mL for 3h, washed and lysed (4h -replication point-). Bacterial counts and inocula were determined by serial dilutions and plating. The invasion and replication index were calculated as CFU/mL at invasion time point divided by the inoculum CFU/mL and CFU/mL at 4h divided by the CFU/mL at invasion, respectively. Competitive assays were performed as described for Caco-2 but using the specific time points for J774 infections.

### Growth analysis and LAMP-1 recruitment in J774 macrophages infected with STm strains

The invasion and replication assays in macrophages were performed as described above with WT or  $\Delta ecotin$  strains carrying the pBR322-TIMER. DS-red (dicroic longpass 640nm with filter 590/60) and green (dicroic longpass 560nm and filter 515/20) fluorescence after excitation with a 488nm laser were acquired simultaneously. The background was subtracted and the green/orange-fluorescence was plotted for each bacterium. The pBR322-TIMER was a gift from Dirk Bumann (Addgene-plasmid #103056). LAMP-1 recruitment was analyzed in infected macrophages with STm strains carrying the pNCS-mClover3. LAMP-1 was stained as described previously for LAMP-2 but using a rat-IgG anti-mouse LAMP-1 and anti-rat-IgG-AlexaFluor647 (Invitrogen) [55]. Images of random fields were acquired, and the background was subtracted. Colocalization was calculated using the Manders approach for each field with the Icy Microscopy Software.

### Survival after incubation of STm with J774 derived microsomes

The J774 microsomes were obtained as described before [57]. STm strains ( $1 \times 10^4$  CFU) were incubated (2h) with or without microsomes in buffer (DTT 2mM, sodium citrate 50mM, pH=4.5) and then bacterial counts were determined. The relative bacterial counts were obtained by normalizing the CFU by WT strain in each condition.

### Neutrophil elastase inhibition

Human neutrophil elastase (10nM) was incubated with buffer (Tris-HCl 10mM, pH=8.0), Ecotin or PIC (positive control) and N-Methoxysuccinyl-Ala-Ala-Pro-Val-AMC (Sigma) 20μM as substrate. Cleavage of the substrate led to fluorescence increase and was recorded (10min). The slope of the linear part of the curves was normalized by the buffer condition.

### Survival after incubation with human PMNs

Peripheral blood was obtained from venipuncture of human healthy adult donors and then deposited into anticoagulated tubes. The PMNs were isolated by centrifugation on Ficoll-Paque, dextran sedimentation, and hypotonic lysis. Purity of PMN preparation was greater than 98% and cells were used immediately after isolation. The STm strains (10<sup>6</sup> CFU) were co-incubated with PMNs (10<sup>6</sup> cells) in RPMI with 10% FBS (inactivated at 65°C) for 90min (37°C). DPI 10μM was added to PMNs 20min before infection. The survival was calculated as CFU/mL in presence of neutrophils over CFU/mL in medium.

### Survival after incubation with neutrophil granules content

Supernatants of degranulated PMNs were obtained after treatment with cytochalasin-B and fMLP as previously described [58]. Then, 10<sup>6</sup> CFU of the STm strains were mixed with supernatants of ~10<sup>6</sup> degranulated PMNs for 90min (37°C). The survival was calculated as CFU/mL in presence of granules over CFU/mL in medium.

### Survival after incubation with neutrophil extracellular traps

Purified human PMNs were incubated with phorbol 12-myristate 13-acetate (PMA) (Sigma) 100nM for 4h. Then, DNaseI (Sigma) (2U/mL) was added for 10 min (37°C). Afterwards, EDTA (5mM) was added and the supernatant containing NETs was separated by centrifugation (3000×g). STm strains (10<sup>6</sup> CFU) were mixed with the NETs of ~10<sup>6</sup> PMNs for 90 min (37°C). The survival was calculated as CFU/mL in presence of NETs over CFU/mL in culture medium. The rEcotin was added to the NETs 5min before the co-incubation with the Δeco strain.

### Statistical analysis

Statistical analyses were performed using GraphPad Prism (GraphPad Software, Inc., San Diego, CA, USA). The normality of the data was tested to determine whether parametric tests could be used, if possible. The statistical tests used are indicated in figure legends. A p<0.05 was considered statistically significant. ns=not statistically significant (p>0.05).

### Supporting information

**S1 Data. Numerical data used in all figures.** Excel spreadsheet containing, on separate sheets, the numerical data for all the figures in this work. (XLSX)

**S1 Fig. Characterization of Δeco strain.** (A) PCR made with the specific primers flanking the *ecotin* (EcotinFP and EcotinRV) gene showing a band of 599 bp where *ecotin* is present and a band of 1614 bp where the kanamycin resistance cassette is present. The positive control (+) corresponds to STm genomic DNA as template. For the WT, Δeco and Δeco+eco strains, one fresh colony was used for colony-PCR. (B) Western blot of bacterial lysates for each strain stained with mouse anti-Ecotin primary antibody and secondary rabbit anti-mouse. Recombinant Ecotin was added as a positive control. (C) Study of influence of *ecotin* on the membrane

permeability of STm using N-phenyl-1-naphthylamine (NPN) uptake assay. Fluorescence was plotted after 10min incubation. Bars represent the mean±SEM. Dots represent independent experiments. Student's t-test. <sup>ns</sup>*p*>0.05. **(D)** Analysis of influence of *ecotin* in growth curves. Bacteria from overnight cultures were diluted in LB or LB-NaCl 0.3M and seeded in 96 wells plate to measure OD<sub>620nm</sub> using a microplate reader at 37°C and agitation. Representative of three experiments. **(E)** Swimming assays performed to assess possible contribution of *ecotin* to motility. A 2μL spot of overnight cultures was seeded in the middle of a LB-Agar 0.3% plate. Then the plates were incubated at 30°C for 24h. The area was normalized by the WT strain. Dots represents independent experiments. Bars represent the mean±SEM. One-way ANOVA with Bonferroni post-test. <sup>ns</sup>*p*>0.05.

(TIF)

**S2 Fig. Swimming is not involved in the lower adhesion exerted by Δ*eco*.** **(A-B)** Adhesion assays in Caco-2 and HT-29 monolayers with centrifugation of bacteria and monolayers for 5min at 400xg before the 30min incubation. Bars represent the mean±SEM. Dots are technical replicates. Data from one representative experiment of at least two independent experiments. Student's t-test. <sup>\*\*</sup>*p*<0.01. **(C)** 10<sup>6</sup> CFU of the WT, Δ*eco* or Δ*eco*+*eco* strains were incubated with Triton X-100 0.1% to study if they were susceptible to its action. After 15min at room temperature, serial dilutions and plating were performed to assess bacterial counts and then they were normalized by the WT strain. Bars represent the mean±SEM. Dots represent independent experiments. Kruskal-Wallis test. <sup>ns</sup>*p*>0.05. **(D)** Adhesion and invasion assay in HT-29 monolayers. To measure invasion, the monolayers were incubated 30 min with the indicated strains and then further incubated with gentamicin 100 μg/mL for 60 min before performing bacterial counts. The invasion index was calculated as the bacteria recovered after gentamicin normalized to the bacteria in the inoculum. Bars represent the mean±SEM. Dots are technical replicates. Data from one experiment. Kruskal-Wallis test. <sup>ns</sup>*p*>0.05, <sup>\*</sup>*p*<0.05. **(E-F)** Invasion assay in Caco-2 and HT-29. Similar to (D) but using 90 min incubation instead of 30 min before adding the gentamicin to kill extracellular bacteria. The invasion index was calculated as the bacteria recovered after gentamicin normalized to the bacteria in the inoculum. Bars represent the mean±SEM. Dots are technical replicates. Data from one representative experiment of two independent experiments. Student's t-test. <sup>ns</sup>*p*>0.05, <sup>\*</sup>*p*<0.05.

(TIF)

**S3 Fig. Casein degradation by purified microsomes from J774 macrophages.** **(A)** Microsomes at a concentration of 1 mg/mL were co-incubated with casein-BODIPY and fluorescence was measured over the time. Dots are mean±SEM. Data from one representative experiment of at least two independent experiments.

(TIF)

**S4 Fig. Characterization of Human PMN induced granules and NETs.** **(A)** Degranulated supernatants were co-incubated with neutrophil elastase specific fluorescent substrate and fluorescence was measured over the time. Purified neutrophil elastase was used as control in the indicated concentrations. Dots are mean±SEM. Data from one blood donor. **(B)** NETs were co-incubated with neutrophil elastase specific fluorescent substrate and fluorescence was measure over the time. Purified neutrophil elastase was used as control in the indicated concentration. Dots are mean±SEM. Data from one blood donor. **(C)** DNA determination by Sytox Green addition, the more DNA the more fluorescence obtained. The fluorescence was measured in a microplate reader. Bars are mean±SEM. Data from one blood donor. **(D)** Purified human PMNs were seeded in glass coverslips pre-treated with poly-L-lysine. Then, PMNs were left untreated (Basal) or treated with PMA 100 nm for 4 h (PMA), neutrophil myeloperoxidase (MPO) was stained with a green fluorescent primary antibody and DNA was



stained with propidium iodide (IP). Confocal microscopy images from a representative field are shown showing NETs formation after PMA treatment. (E) To assess the ability of DPI to inhibit ROS production a luminol assay was used. Luminol emits luminescence in the presence of ROS, thus measuring the luminescence intensity in a microplate reader serves as an indicator of ROS formation. Neutrophils were pre-treated or not with DPI 10  $\mu$ M for 20 min before co-incubating with a MOI 1:1 of STm WT strain. Each point represents a time point. The mean data of 2 independent donors is shown.

(TIF)

**S5 Fig. Prediction of signal peptide and export system to periplasmic space.** (A) The protein sequence of the STm Ecotin was used as input sequence in SignalIP 6.0 to predict the signal peptide and export system.

(EPS)

**S6 Fig. The  $\Delta$ ecotin strain presents lower fitness than the WT in competitive experiments performed *in vivo* in the cecum of infected mice** (A) Streptomycin pre-treated mice were given a 1:1 mixture of WT: $\Delta$ eco (n=6) or WT: $\Delta$ eco+eco (n=3) by oral gavage containing  $10^7$  CFU (n=6) or WT and  $\Delta$ eco+eco (n=3). At 72 h p.i. the animals were sacrificed and the cecum and spleen were harvested. The organs were processed to determine the bacterial load using agar-SS plates with or without antibiotics to determine the ratio  $\Delta$ eco/WT or  $\Delta$ eco+eco/WT. The ratios were normalized to the ratio in the inoculum to obtain the competitive index (left panel). The actual CFU recovered from cecum and spleen are shown in the middle and right panel respectively. The mean $\pm$ SEM is presented. Each point represents an individual mouse. One sample T-test vs 1. <sup>ns</sup> $p>0.05$ , <sup>\*\*\*</sup> $p<0.001$  (B) Mice were given  $10^5$  CFU of WT (n=4) or  $\Delta$ eco (n=4) strains and 120 h later they were sacrificed to assess dissemination. The spleen and a portion of the liver were harvested and processed to determine the bacterial load. Bacterial load was normalized per spleen and per gram of liver respectively. The bars represent mean $\pm$ SEM. Each point represents an individual mouse. Mann-Whitney test. <sup>ns</sup> $p>0.05$ .

(TIF)

**S7 Fig. The STm  $\Delta$ eco and WT strains induce PMNs recruitment similarly in the peritoneal cavity after intraperitoneal injection.** (A) BALB/c mice were given by intraperitoneal injection  $10^4$  CFU of WT (n=3) or  $\Delta$ eco (n=3) strains. Then, 4 h after infection, mice were sacrificed and suspended cells obtained by peritoneal lavage with RPMI. The cells were labeled with anti-Ly6G, anti-CD11b and anti-Ly6C, the triple positive cells were considered PMNs. The bars represent mean $\pm$ SEM. Each point represents an individual mouse. Mann-Whitney test. <sup>ns</sup> $p>0.05$ .

(TIF)

**S1 Table. Strains, plasmids and primers.**

(PDF)

## Acknowledgments

We thank Dr. Susana K. Checa for kindly giving us the p22 phage. We also thank Rosario Cespedes and Jose Acosta for helping in the obtention of blood samples. Finally, we thank Weiping Chu and Steffen Porwollik for technical help.

## Author contributions

**Conceptualization:** Lorena M. Coria, Karina A. Pasquevich, Juliana Cassataro.

**Data curation:** Francisco Guaimas, Lucas Saposnik.

**Formal analysis:** Lucas Saposnik.

**Funding acquisition:** Michael McClelland, Juliana Cassataro.

**Investigation:** Lucas Saposnik, Laura Bruno, Francisco Guaimas, Julieta Pandolfi, Melina Pol, Maria Eugenia Urga.

**Methodology:** Lucas Saposnik, Lorena M. Coria, Florencia Sabbione, Michael McClelland, Analia Trevani, Julieta Pandolfi, Karina A. Pasquevich, Juliana Cassataro.

**Project administration:** Juliana Cassataro.

**Resources:** Michael McClelland, Analia Trevani.

**Supervision:** Lorena M. Coria, Karina A. Pasquevich, Juliana Cassataro.

**Visualization:** Lucas Saposnik, Francisco Guaimas.

**Writing – original draft:** Lucas Saposnik, Lorena M. Coria, Karina A. Pasquevich, Juliana Cassataro.

**Writing – review & editing:** Lucas Saposnik, Lorena M. Coria, Laura Bruno, Francisco Guaimas, Julieta Pandolfi, Melina Pol, Maria Eugenia Urga, Florencia Sabbione, Michael McClelland, Analia Trevani, Karina A. Pasquevich, Juliana Cassataro.

## References

1. Ferrari R, Rosario D, Cunha-Neto A, Mano S, Figueiredo E, Conte-Junior C. Worldwide epidemiology of Salmonella serovars in animal-based foods: a meta-analysis. *Appl Environ Microbiol*. 2019;85(14):e01750–19. <https://doi.org/10.1128/AEM.01750-19>
2. Gal-Mor O, Boyle EC, Grassl GA. Same species, different diseases: how and why typhoidal and non-typhoidal Salmonella enterica serovars differ. *Front Microbiol*. 2014;5:391. <https://doi.org/10.3389/fmicb.2014.00391> PMID: 25136336
3. Helaine S, Cheverton AM, Watson KG, Faure LM, Matthews SA, Holden DW. Internalization of Salmonella by macrophages induces formation of nonreplicating persisters. *Science*. 2014;343(6167):204–8. <https://doi.org/10.1126/science.1244705> PMID: 24408438
4. Castanheira S, Garcia-Del Portillo F. Salmonella populations inside host cells. *Front Cell Infect Microbiol*. 2017;7:432.
5. Anderson C, Kendall M. Salmonella enterica serovar Typhimurium strategies for host adaptation. *Front Microbiol*. 2017;8:1983.
6. Popa GL, Papa MI. Salmonella spp. infection - a continuous threat worldwide. *Germs*. 2021;11(1):88–96. <https://doi.org/10.18683/germs.2021.1244> PMID: 33898345
7. Teklemariam AD, Al-Hindi RR, Albiheyri RS, Alharbi MG, Alghamdi MA, Filimban AAR, et al. Human salmonellosis: a continuous global threat in the farm-to-fork food safety continuum. *Foods*. 2023;12(9):1756. <https://doi.org/10.3390/foods12091756> PMID: 37174295
8. Salvo Romero E, Alonso Cotoner C, Pardo Camacho C, Casado Bedmar M, Vicario M. The intestinal barrier function and its involvement in digestive disease. *Rev Esp Enferm Dig*. 2015;107(11):686–96. <https://doi.org/10.17235/reed.2015.3846/2015> PMID: 26541659
9. Mahato RI, Narang AS, Thoma L, Miller DD. Emerging trends in oral delivery of peptide and protein drugs. *Crit Rev Ther Drug Carrier Syst*. 2003;20(2–3):153–214. <https://doi.org/10.1615/critrevtherdrug-carriersyst.v20.i23.30> PMID: 14584523
10. Álvarez-Ordóñez A, Begley M, Prieto M, Messens W, López M, Bernardo A, et al. Salmonella spp. survival strategies within the host gastrointestinal tract. *Microbiology (Reading)*. 2011;157(Pt 12):3268–81. <https://doi.org/10.1099/mic.0.050351-0> PMID: 22016569
11. Viala JPM, Méresse S, Pocachard B, Guilhon A-A, Aussel L, Barras F. Sensing and adaptation to low pH mediated by inducible amino acid decarboxylases in Salmonella. *PLoS One*. 2011;6(7):e22397. <https://doi.org/10.1371/journal.pone.0022397> PMID: 21799843
12. De Meyer F, Carlier A. Ecotin: A versatile protease inhibitor of bacteria and eukaryotes. *Front Microbiol*. 2023;14:1114690.
13. McGrath ME, Gillmor SA, Fletterick RJ. Ecotin: lessons on survival in a protease-filled world. *Protein Sci*. 1995;4(2):141–8. <https://doi.org/10.1002/pro.5560040201> PMID: 7757004

14. Eggers CT, Murray IA, Delmar VA, Day AG, Craik CS. The periplasmic serine protease inhibitor ecotin protects bacteria against neutrophil elastase. *Biochem J*. 2004;379(Pt 1):107–18. <https://doi.org/10.1042/BJ20031790> PMID: [14705961](#)
15. Tseng B, Reichhardt C, Merrihew G, Araujo-Hernandez S, Harrison J, MacCoss M. A biofilm matrix-associated protease inhibitor protects *Pseudomonas aeruginosa* from proteolytic attack. *mBio*. 2018;9(2):. <https://doi.org/10.1128/mBio.00000-18> PMID: [30716090](#)
16. Subramaniam S, Müller VS, Hering NA, Mollenkopf H, Becker D, Heroven AK, et al. Contribution of the Cpx envelope stress system to metabolism and virulence regulation in *Salmonella enterica* serovar Typhimurium. *PLoS One*. 2019;14(2):e0211584. <https://doi.org/10.1371/journal.pone.0211584> PMID: [30716090](#)
17. Huang X, Zhou X, Jia B, Li N, Jia J, He M. Transcriptional sequencing uncovers survival mechanisms of *Salmonella enterica* serovar Enteritidis in antibacterial egg white. *mSphere*. 2019;4(1):. <https://doi.org/10.1128/mSphere.00000-19> PMID: [30716090](#)
18. Weinrauch Y, Drujan D, Shapiro SD, Weiss J, Zychlinsky A. Neutrophil elastase targets virulence factors of enterobacteria. *Nature*. 2002;417(6884):91–4. <https://doi.org/10.1038/417091a> PMID: [12018205](#)
19. Stapels DAC, Geisbrecht BV, Rooijackers SHM. Neutrophil serine proteases in antibacterial defense. *Curr Opin Microbiol*. 2015;23:42–8. <https://doi.org/10.1016/j.mib.2014.11.002> PMID: [25461571](#)
20. Houghton AM, Hartzell WO, Robbins CS, Gomis-Rüth FX, Shapiro SD. Macrophage elastase kills bacteria within murine macrophages. *Nature*. 2009;460(7255):637–41. <https://doi.org/10.1038/nature08181> PMID: [19536155](#)
21. Barthel M, Hapfelmeier S, Quintanilla-Martínez L, Kremer M, Rohde M, Hogardt M, et al. Pretreatment of mice with streptomycin provides a *Salmonella enterica* serovar Typhimurium colitis model that allows analysis of both pathogen and host. *Infect Immun*. 2003;71(5):2839–58. <https://doi.org/10.1128/IAI.71.5.2839-2858.2003> PMID: [12704158](#)
22. Loetscher Y, Wieser A, Lengsfeld J, Kaiser P, Schubert S, Heikenwalder M, et al. *Salmonella* transiently reside in luminal neutrophils in the inflamed gut. *PLoS One*. 2012;7(4):e34812. <https://doi.org/10.1371/journal.pone.0034812> PMID: [22493718](#)
23. Claudi B, Spröte P, Chirkova A, Personnic N, Zankl J, Schürmann N, et al. Phenotypic variation of *Salmonella* in host tissues delays eradication by antimicrobial chemotherapy. *Cell*. 2014;158(4):722–33. <https://doi.org/10.1016/j.cell.2014.06.045> PMID: [25126781](#)
24. Haraga A, Ohlson MB, Miller SI. *Salmonellae* interplay with host cells. *Nat Rev Microbiol*. 2008;6(1):53–66. <https://doi.org/10.1038/nrmicro1788> PMID: [18026123](#)
25. Roy Chowdhury A, Sah S, Varshney U, Chakravorty D. *Salmonella* Typhimurium outer membrane protein A (OmpA) renders protection from nitrosative stress of macrophages by maintaining the stability of bacterial outer membrane. *PLoS Pathog*. 2022;18(8):e1010708. <https://doi.org/10.1371/journal.ppat.1010708> PMID: [35969640](#)
26. Burton NA, Schürmann N, Casse O, Steeb AK, Claudi B, Zankl J, et al. Disparate impact of oxidative host defenses determines the fate of *Salmonella* during systemic infection in mice. *Cell Host Microbe*. 2014;15(1):72–83. <https://doi.org/10.1016/j.chom.2013.12.006> PMID: [24439899](#)
27. Coburn B, Grassl GA, Finlay BB. *Salmonella*, the host and disease: a brief review. *Immunol Cell Biol*. 2007;85(2):112–8. <https://doi.org/10.1038/sj.icb.7100007> PMID: [17146467](#)
28. Wu J, Sabag-Daigle A, Borton MA, Kop LFM, Szkoda BE, Deatherage Kaiser BL, et al. *Salmonella*-mediated inflammation eliminates competitors for fructose-asparagine in the gut. *Infect Immun*. 2018;86(5):e00945–17. <https://doi.org/10.1128/IAI.00945-17> PMID: [29483291](#)
29. Gill N, Ferreira RBR, Antunes LCM, Willing BP, Sekirov I, Al-Zahrani F, et al. Neutrophil elastase alters the murine gut microbiota resulting in enhanced *Salmonella* colonization. *PLoS One*. 2012;7(11):e49646. <https://doi.org/10.1371/journal.pone.0049646> PMID: [23155475](#)
30. Winter SE, Thiennimitr P, Winter MG, Butler BP, Huseby DL, Crawford RW, et al. Gut inflammation provides a respiratory electron acceptor for *Salmonella*. *Nature*. 2010;467(7314):426–9. <https://doi.org/10.1038/nature09415> PMID: [20864996](#)
31. Gül E, Enz U, Maurer L, Abi Younes A, Fattinger SA, Nguyen BD, et al. Intraluminal neutrophils limit epithelium damage by reducing pathogen assault on intestinal epithelial cells during *Salmonella* gut infection. *PLoS Pathog*. 2023;19(6):e1011235. <https://doi.org/10.1371/journal.ppat.1011235> PMID: [37384776](#)
32. Paskevich KA, Carabajal MV, Guaimas FF, Bruno L, Roset MS, Coria LM, et al. Omp19 enables *Brucella abortus* to evade the antimicrobial activity from host's proteolytic defense system. *Front Immunol*. 2019;10:1436. <https://doi.org/10.3389/fimmu.2019.01436> PMID: [31297115](#)
33. Thomas C, Nothaft H, Yadav R, Fodor C, Alemka A, Oni O, et al. Characterization of ecotin homologs from *Campylobacter rectus* and *Campylobacter showae*. *PLoS One*. 2020;15(12):e0244031. <https://doi.org/10.1371/journal.pone.0244031> PMID: [33378351](#)

34. Hooton D, Lentle R, Monro J, Wickham M, Simpson R. The secretion and action of brush border enzymes in the mammalian small intestine. *Rev Physiol Biochem Pharmacol*. 2015;168:59–118.
35. Misselwitz B, Barrett N, Kreibich S, Vonaesch P, Andrichske D, Rout S, et al. Near surface swimming of *Salmonella* Typhimurium explains target-site selection and cooperative invasion. *PLoS Pathog*. 2012;8(7):e1002810. <https://doi.org/10.1371/journal.ppat.1002810> PMID: 22911370
36. Fattinger SA, Sellin ME, Hardt W-D. *Salmonella* effector driven invasion of the gut epithelium: breaking in and setting the house on fire. *Curr Opin Microbiol*. 2021;64:9–18. <https://doi.org/10.1016/j.mib.2021.08.007> PMID: 34492596
37. Horstmann JA, Zschieschang E, Truschel T, de Diego J, Lunelli M, Rohde M, et al. Flagellin phase-dependent swimming on epithelial cell surfaces contributes to productive *Salmonella* gut colonisation. *Cell Microbiol*. 2017;19(8):10.1111/cmi.12739. <https://doi.org/10.1111/cmi.12739> PMID: 28295924
38. Ireland PM, Marshall L, Norville I, Sarkar-Tyson M. The serine protease inhibitor Ecotin is required for full virulence of *Burkholderia pseudomallei*. *Microb Pathog*. 2014;67–68:55–8. <https://doi.org/10.1016/j.micpath.2014.01.001> PMID: 24462575
39. Holden DW. Trafficking of the *Salmonella* vacuole in macrophages. *Traffic*. 2002;3(3):161–9. <https://doi.org/10.1034/j.1600-0854.2002.030301.x> PMID: 11886586
40. Fitzsimmons L, Liu L, Kant S, Kim J, Till J, Jones-Carson J, et al. SpoT induces intracellular *Salmonella* virulence programs in the phagosome. *mBio*. 2020;11(1):e00920–19. <https://doi.org/10.1128/mBio.00920-19>
41. Choi J, Kim H, Chang Y, Yoo W, Kim D, Ryu S. Programmed delay of a virulence circuit promotes *salmonella* pathogenicity. *mBio*. 2019;10(2).
42. Tuli A, Sharma M. How to do business with lysosomes: *Salmonella* leads the way. *Curr Opin Microbiol*. 2019;47:1–7. <https://doi.org/10.1016/j.mib.2018.10.003> PMID: 30391777
43. Craig M, Slauch JM. Phagocytic superoxide specifically damages an extracytoplasmic target to inhibit or kill *Salmonella*. *PLoS One*. 2009;4(3):e4975. <https://doi.org/10.1371/journal.pone.0004975> PMID: 19305502
44. Duncan D, Lupien A, Behr MA, Auclair K. Effect of pH on the antimicrobial activity of the macrophage metabolite itaconate. *Microbiology (Reading)*. 2021;167(5):10.1099/mic.0.001050. <https://doi.org/10.1099/mic.0.001050> PMID: 34020726
45. Michelucci A, Cordes T, Ghelfi J, Pailot A, Reiling N, Goldmann O, et al. Immune-responsive gene 1 protein links metabolism to immunity by catalyzing itaconic acid production. *Proc Natl Acad Sci U S A*. 2013;110(19):7820–5. <https://doi.org/10.1073/pnas.1218599110> PMID: 23610393
46. Kim B, Richards S, Gunn J, Slauch J. Protecting against antimicrobial effectors in the phagosome allows SodCII to contribute to virulence in *Salmonella enterica* serovar Typhimurium. *J Bacteriol*. 2010;192(8):2140–9.
47. Rosenberger CM, Gallo RL, Finlay BB. Interplay between antibacterial effectors: a macrophage antimicrobial peptide impairs intracellular *Salmonella* replication. *Proc Natl Acad Sci U S A*. 2004;101(8):2422–7. <https://doi.org/10.1073/pnas.0304455101> PMID: 14983025
48. Bai F, McCormack RM, Hower S, Plano GV, Lichtenheld MG, Munson GP. Perforin-2 breaches the envelope of phagocytosed bacteria allowing antimicrobial effectors access to intracellular targets. *J Immunol*. 2018;201(9):2710–20. <https://doi.org/10.4049/jimmunol.1800365> PMID: 30249808
49. Fenlon LA, Slauch JM. Phagocyte roulette in *Salmonella* killing. *Cell Host Microbe*. 2014;15(1):7–8. <https://doi.org/10.1016/j.chom.2014.01.001> PMID: 24439894
50. Westerman TL, Bogomolnaya L, Andrews-Polymenis HL, Sheats MK, Effenbein JR. The *Salmonella* type-3 secretion system-1 and flagellar motility influence the neutrophil respiratory burst. *PLoS One*. 2018;13(9):e0203698. <https://doi.org/10.1371/journal.pone.0203698> PMID: 30204776
51. Brinkmann V, Reichard U, Goosmann C, Fauler B, Uhlemann Y, Weiss DS, et al. Neutrophil extracellular traps kill bacteria. *Science*. 2004;303(5663):1532–5. <https://doi.org/10.1126/science.1092385> PMID: 15001782
52. Sabbione F, Keitelman IA, Shiromizu CM, Vereertbrugghen A, Vera Aguilar D, Rubatto Birri PN, et al. Regulation of human neutrophil IL-1 $\beta$  secretion induced by *Escherichia coli* O157:H7 responsible for hemolytic uremic syndrome. *PLoS Pathog*. 2023;19(12):e1011877. <https://doi.org/10.1371/journal.ppat.1011877> PMID: 38127952
53. Porwollik S, Santiviago CA, Cheng P, Long F, Desai P, Fredlund J, et al. Defined single-gene and multi-gene deletion mutant collections in *Salmonella enterica* sv Typhimurium. *PLoS One*. 2014;9(7):e99820. <https://doi.org/10.1371/journal.pone.0099820> PMID: 25007190



54. Sprouffske K, Wagner A. Growthcurver: an R package for obtaining interpretable metrics from microbial growth curves. BMC Bioinformatics. 2016;17:172. <https://doi.org/10.1186/s12859-016-1016-7> PMID: [27094401](https://pubmed.ncbi.nlm.nih.gov/27094401/)
55. Coria LM, Risso GS, Guaimas FF, Ferrero MC, Bruno L, Pasquevich KA, et al. Oral co-administration of a bacterial protease inhibitor in the vaccine formulation increases antigen delivery at the intestinal epithelial barrier. J Control Release. 2019;293:158–71. <https://doi.org/10.1016/j.jconrel.2018.11.025> PMID: [30496771](https://pubmed.ncbi.nlm.nih.gov/30496771/)
56. Gagnon M, Zihler Berner A, Chervet N, Chassard C, Lacroix C. Comparison of the Caco-2, HT-29 and the mucus-secreting HT29-MTX intestinal cell models to investigate *Salmonella* adhesion and invasion. J Microbiol Methods. 2013;94(3):274–9. <https://doi.org/10.1016/j.mimet.2013.06.027> PMID: [23835135](https://pubmed.ncbi.nlm.nih.gov/23835135/)
57. Coria L, Ibanez A, Tkach M, Sabbione F, Bruno L, Carabajal M. A *Brucella* spp. protease inhibitor limits antigen lysosomal proteolysis, increases cross-presentation, and enhances CD8+ T cell responses. J Immunol. 2016;196(10):4014–29.
58. Standish AJ, Weiser JN. Human neutrophils kill *Streptococcus pneumoniae* via serine proteases. J Immunol. 2009;183(4):2602–9.
